# Hematopoietic growth factors: ESMO Recommendations for the applications

R. Greil<sup>1</sup>, O. Psenak<sup>2</sup> & F. Roila<sup>3</sup>

On behalf of the ESMO Guidelines Working Group\*

<sup>1,2</sup>Third Medical Department of Hematology, Oncology, Hemostaseology, Infectious Diseases and Rheumatology, Paracelsus University Hospital, Salzburg, Austria;

<sup>3</sup>Department of Medical Oncology, S. Maria della Misericordia Hospital, Perugia, Italy

## definition of febrile neutropenia

Febrile neutropenia (FNP) is defined as a rise in axillary temperature to above 38.5°C for a duration of >1 h while having an absolute neutrophil count (ANC) of  $<0.5 \times 10^9/l$ .

## incidence of FNP, complication rates and mortality

Despite relatively high rates of low neutrophil counts during standard dose chemotherapy regimens for malignancies other than acute leukemias, rates of FNP, other complication rates and mortality rates are relatively low for most standard chemotherapies (Table 1).

These rates do not justify the use of hematopoietic growth factors (hGFs) such as granulocyte colony-stimulating factor (G-CSF) or its pegylated form (pegfilgrastim). Colony-stimulating growth factors should not be used in patients without neutropenia and especially not in patients suffering from community- or hospital-acquired pneumonitis [I, A].

## indication for primary prophylaxis of FNP by hGFs

Table 2 describes the indications for primary prophylaxis of FNP by hGFs and Table 3 gives examples of chemotherapy regimens with a risk of FNP of ~20%.

## special situations for use of hGFs for standard therapy

Table 4 describes special situations for the use of hGFs for standard therapy.

## dose schedule, route of application of G-CSF and pegfilgrastim

Use 5 µg/kg/day of G-CSF s.c. 24–72 h after the last day of chemotherapy until sufficient/stable ANC recovery (achieving a target ANC of  $>10 \times 10^9/l$  is not necessary). Pegfilgrastim, injected s.c. as a single dose of either 100 µg/kg (individualized) or of a total dose of 6 mg (general approach), is considered equally effective [I, A].

### note

G-CSF is contraindicated during radiotherapy to the chest due to increased rate of complications and death [I, A].

Risk for severe thrombocytopenia when hGFs are given immediately before or simultaneously with chemotherapy.

Possible risk of subsequent acute myeloid leukemia (AML) or myelodysplastic syndrome (MDS) in women receiving adjuvant chemotherapy for breast cancer and hGFs. Even if these results will be confirmed, the absolute risk is low (1.8% versus 0.7%

Table 1.

|                              |              |
|------------------------------|--------------|
| Leukopenia WHO grade 4       | 2–28%        |
| Febrile neutropenia          | up to 10–57% |
| Infections WHO grade 3 or 4  | up to 16%    |
| Death in febrile neutropenia | 0–7%         |

FNP, febrile neutropenia; WHO, World Health Organization.

Table 2. Indications for primary prophylaxis of FNP by hGFs

| Reasonable only if                               | Parameter                                                                                                              |
|--------------------------------------------------|------------------------------------------------------------------------------------------------------------------------|
| Probability of FNP ~20%<br>or                    | <i>Affected:</i> ANC recovery [I], fever [I], infection rate [I], use of i.v. antibiotics [II], hospital discharge [I] |
| Dose reduction deemed detrimental to outcome [A] | <i>Controversial:</i> infectious mortality [I]                                                                         |
|                                                  | <i>Not affected:</i> Survival [I]                                                                                      |

\*Correspondence to: ESMO Guidelines Working Group, ESMO Head Office, Via L. Taddei 4, CH-6962 Viganello-Lugano, Switzerland

Approved by the ESMO Guidelines Working Group: February 2002, last update February 2008. This publication supercedes the previously published version—Ann Oncol 2007; 18 (Suppl 2): ii89–ii91.

Conflict of interest: the authors have reported no conflicts of interest.

**Table 3.** Examples of regimens with a risk of FNP of ~20%

|                            |                                                                                                               |
|----------------------------|---------------------------------------------------------------------------------------------------------------|
| Bladder cancer             | MVAC (methotrexate, vinblastine, doxorubicin, cisplatin)<br>TC (paclitaxel, cisplatin)                        |
| Breast cancer              | TAC (docetaxel, doxorubicin, cyclophosphamide)<br>Dose-dense AC→T (doxorubicin, cyclophosphamide, paclitaxel) |
| Cancer of the cervix       | TC (paclitaxel, cisplatin)                                                                                    |
| Gastric cancer             | DCF (docetaxel, cisplatin, fluorouracil)                                                                      |
| Head and neck cancer       | Paclitaxel, ifosfamide, mesna, cisplatin                                                                      |
| Non-Hodgkin's lymphoma     | CHOP-14<br>ICE<br>RICE<br>DHAP (dexamethasone, cisplatin, cytarabine)                                         |
| Non-small-cell lung cancer | DP (docetaxel, carboplatin)                                                                                   |
| Ovarian                    | Topotecan                                                                                                     |
| Sarcoma                    | MAID (mesna, doxorubicin, ifosfamide, etoposide)<br>Doxorubicin, ifosfamide                                   |
| Small-cell lung cancer     | CAE (cyclophosphamide, doxorubicin, etoposide)<br>Topotecan                                                   |
| Testicular cancer          | VIP (vinblastine, ifosfamide, cisplatin)                                                                      |

**Table 4.** Special situations for the use of hGFs for standard therapy

| Indication                      | Special situation                                                                                                                                 | Use of hGF   |
|---------------------------------|---------------------------------------------------------------------------------------------------------------------------------------------------|--------------|
| Primary prophylaxis             | Reduced marrow reserve e.g. ANC $<1.5 \times 10^9/l$ due to: radiotherapy of $>20\%$ marrow                                                       | Yes [III, C] |
|                                 | Human immunodeficiency virus                                                                                                                      | Yes [II, B]  |
|                                 | Patients aged $\geq 65$ years treated with curative regimens (CHOP or more intensive regimens for patients with aggressive non-Hodgkin lymphoma)  | Yes          |
| Secondary prophylaxis           | Further infections in the next treatment cycle considered life threatening                                                                        | Yes          |
|                                 | Dose reduction below threshold<br>Delay of chemotherapy<br>Lack of protocol adherence if compromising cure rate, overall or disease-free survival |              |
| Therapy of afebrile neutropenia | –                                                                                                                                                 | No [II, D]   |
| Therapy of FNP                  | General                                                                                                                                           | No [C]       |
| Therapy of high-risk FNP        | Protracted FNP ( $>7$ days), hypotension, sepsis, pneumonia or fungal infection                                                                   | Yes          |

within 48 months of breast cancer diagnosis) and, therefore, the benefits of hGFs still outweigh the risk.

### use of G-CSF and pegfilgrastim in high-risk situations

Therapy of acute leukemias, autologous and allogeneic stem cell transplantations (TPLs) lead to higher risks of FNP and potentially lethal complications.

Incidence of FNP in high-risk situations: regular during autologous and allogeneic peripheral blood stem-cell (PBSC)-TPLs and bone marrow TPL, during graft failure, in 35–48% of AML cases at diagnosis, and in 13–30% during acute lymphoblastic leukemia (ALL) induction chemotherapy.

Mortality: 0–10% in autologous TPL, highly variable in allogeneic TPL, 80% during graft failure, 20–26% during first 2 months in AML and 2–10% during induction of ALL.

### indications for granulopoietic CSFs in high-risk situations

Table 5 describes the indications for granulopoietic CSFs in high-risk situations.

#### G-CSF after autologous stem-cell TPL

Marrow TPL: start of hGF. Application may safely be postponed until day 5–7 [I]. Recommended dose of G-CSF is 5  $\mu\text{g}/\text{kg}$ .

PBSC TPL: short acceleration of recovery of ANC [I] does not consistently translate into relevant clinical benefit. In standard-risk patients outside trials are not recommended.

#### G-CSF after allogeneic TPL

Reasonable after marrow TPL. Clinical benefit restricted to recovery of ANC. Start 5–7 days after TPL sufficient [I, A]. Insufficient data for TPL with allo-PBSC.

### mobilization of peripheral blood stem cells (PBSC)

#### autologous PBSC

HGFs  $\pm$  chemotherapy are effective. The recommended dose of G-CSF is 10  $\mu\text{g}/\text{kg}$ . hGF-mobilized PBSCs are superior in terms of recovery of ANC over marrow stem cells plus postinfusion hGFs [I, A].

#### allogeneic PBSC

Donor convenience, recovery of ANC hastened, no increased rate of acute graft versus host disease. Faster ANC recovery after PBSC versus marrow stem cells.

### special comments on CSFs as a treatment for radiation injury

Lethal doses of total body radiotherapy (accidental or intentional).

**Table 5.** Indications for granulopoietic CSFs in high-risk situations

| Indication                               | Use of hGFs                                                        | Parameter                                                                                                                                                                                                                         |
|------------------------------------------|--------------------------------------------------------------------|-----------------------------------------------------------------------------------------------------------------------------------------------------------------------------------------------------------------------------------|
| Autologous marrow transplant             | Yes                                                                | ANC [I], fever [I, C], infection [I, C], intravenous antibiotics [I, C]<br>Not affected: infectious mortality [I, A], overall survival [I, A]                                                                                     |
| Autologous hGF PBSC TPL after reinfusion | Controversial                                                      | ANC [I]<br>Not consistently affected: fever, use of i.v. antibiotics<br>Not affected: infectious mortality [I, A], overall survival [I, A]                                                                                        |
| Allogeneic marrow transplant             | Yes                                                                | ANC [I, A]<br>Other parameters inconsistent                                                                                                                                                                                       |
| Graft failure                            | Yes                                                                | Mortality [III–IV, B]                                                                                                                                                                                                             |
| AML                                      | No (trials)                                                        | ANC [I, A]<br>Not affected: infectious mortality [I, C], overall survival [I, C]                                                                                                                                                  |
| MDS                                      | No                                                                 | Mortality may be increased [II, B], despite the absence of an increased transformation to AML                                                                                                                                     |
| ALL                                      | Controversial                                                      | ANC [I, A]<br>Not consistently affected: severe infections, infectious mortality, hospitalization, survival. Increased rates of secondary leukemia have been reported in childhood ALL treated with G-CSF ± radiotherapy [III, C] |
| Indication                               | Clinical outcome                                                   | Use of CSFs                                                                                                                                                                                                                       |
| Doses of 3–10 Gy                         | Probable or certain death from BM failure                          | Yes                                                                                                                                                                                                                               |
| Doses <3 Gy                              | Survival with excellent nursing care                               | No                                                                                                                                                                                                                                |
| Doses >10 Gy                             | Death due to injury to other organs such as gastrointestinal tract | No                                                                                                                                                                                                                                |

**note**

Levels of evidence [I–V] and grades of recommendation [A–D] as used by the American Society of Clinical Oncology are given in square brackets. Statements without grading were considered justified standard clinical practice by the expert authors and the ESMO faculty.

**literature**

- Vogel CL, Wojtukiewicz MZ, Carroll RR et al. First and subsequent cycle use of pegfilgrastim prevents febrile neutropenia in patients with breast cancer: a multicenter, double-blind, placebo-controlled phase III study. *J Clin Oncol* 2005; 23: 1178–1184.
- Timmer-Bonte JN, de Boo TM, Smith HJ et al. Prevention of chemotherapy-induced febrile neutropenia by prophylactic antibiotics plus or minus granulocyte colony-stimulating factor in small cell lung cancer: a Dutch randomized phase III study. *J Clin Oncol* 2005; 23: 7974–7984.
- ASCO Recommendations for the use of hematopoietic colony-stimulating factors: evidence-based, clinical practice guidelines. *J Clin Oncol* 1994; 12: 2471–2508.
- Smith TJ, Khatcheressian J, Lyman GH et al. 2006 update of recommendations for the use of white blood cell growth factors: an evidence-based clinical practice guideline. *J Clin Oncol* 2006; 24: 3187–3205.
- Cheng AC, Stephens DP, Currie BJ. Granulocyte colony stimulating factor (G-CSF) as an adjunct to antibiotics in the treatment of pneumonia in adults. *Cochrane Database Syst Rev* 2003; 4: CD 00400.
- Sung L, Nathan PC, Alibhai SMH et al. Meta-analysis: effect of prophylactic hematopoietic colony-stimulating factors on mortality and outcomes of infections. *Ann Intern Med* 2007; 147: 400–411.
- Kuderer NM, Dale DC, Crawford J et al. Impact of primary prophylaxis with granulocyte colony-stimulating factor in febrile neutropenia and mortality in adult cancer patients receiving chemotherapy: a systematic review. *J Clin Oncol* 2007; 25: 3158–3167.
- Hershman D, Neugut AI, Jacobson JS et al. Acute myeloid leukemia or myelodysplastic syndrome following use of granulocyte colony-stimulating factors during breast cancer adjuvant chemotherapy. *J Natl Cancer Inst* 2007; 99: 196–205.
- Schmitz N, Ljungman P, Cordonnier C et al. Lenograstim after autologous peripheral blood progenitor cell transplantation: results of a double-blind, randomized trial. *Bone Marrow Transplant* 2004; 34: 955–962.
- Green MD, Koelbl H, Baselga J et al. International Pegfilgrastim 749 Study Group. A randomized double-blind multicenter phase III study of fixed-dose single-administration pegfilgrastim versus daily filgrastim in patients receiving myelosuppressive chemotherapy. *Ann Oncol* 2003; 14: 29–35.
- Holmes FA, O'Shaughnessy JA, Vukelja S et al. Blinded, randomized, multicenter study to evaluate single administration pegfilgrastim once per cycle versus daily filgrastim as an adjunct to chemotherapy in patients with high-risk stage II or stage III/IV breast cancer. *J Clin Oncol* 2002; 20: 727–731.
- Relling MV, Boyett JM, Blanco JG et al. Granulocyte colony-stimulating factor and the risk of secondary myeloid malignancy after etoposide treatment. *Blood* 2003; 101: 3862–3867.
- Coiffier B, Lepage E, Briere J et al. CHOP chemotherapy plus rituximab compared with CHOP alone in elderly patients with diffuse large-B-cell lymphoma. *N Engl J Med* 2002; 346: 235–242.
- Waselenko JK, MacVittie TJ, Blakely WF et al. Medical management of the acute radiation syndrome: recommendations of the Strategic national Stockpile Radiation Working Group. *Ann Intern Med* 2004; 140: 1037–1051.
